# Supplementary material
Source: MDPI journal article supplement (https://www.mdpi.com/2673-3951/4/3/24)
Supplement: s1 [file s1]

# Supporting Information

Li<sup>+</sup> separation from multi-ionic mixtures by nanofiltration membranes:  
experiments and modeling

Tobias Hubach <sup>1</sup>, Marcel Pillath <sup>1</sup>, Clemens Knaup <sup>1</sup>, Stefan Schlüter <sup>1</sup> and Christoph Held <sup>1</sup>

<sup>1</sup> TU Dortmund University, Department of Biochemical and Chemical Engineering, Laboratory  
of Fluid Separations, Emil-Figge-Straße 70, 44227 Dortmund, Germany

## Appendix S1: Details on solving the Differential-algebraic-equation

Setting up eq. (8) for three ion species and the electrostatic potential, it is possible to express the ion concentrations and the electrostatic potential at the collocation points as the following matrix multiplication:

$$[C] = [A] \cdot [\theta] \text{ or } [\theta] = [A]^{-1} \cdot [C] \quad (\text{SE1})$$

The rows of the matrix  $[C]$  correspond to the values of the modelled variables at the  $v$  collocation points  $z_1 - z_v$  whereas the columns are the different modelled variables, namely the different ion species concentrations  $c_1 - c_n$  and the electrostatic potential  $\phi$ . Matrix  $[A]$  is a Vandermonde-Matrix. The corresponding polynomial coefficients are stored in matrix  $[\theta]$ , where the rows include the necessary coefficients for the polynomial and the columns represent the different modelled variables.

Equation (SE1) can be transformed for three ion species and the electrostatic potential to:

$$\begin{pmatrix} c_1(z) \\ c_2(z) \\ c_3(z) \\ \phi(z) \end{pmatrix} = [1 \ z \dots z^n] [\theta] \quad (\text{SE2})$$

Thus, substituting eq. (SE1) in eq. (SE2) yields:

$$\begin{pmatrix} c_1(z) \\ c_2(z) \\ c_3(z) \\ \phi(z) \end{pmatrix} = [1 \ z \dots z^n] [A]^{-1} \cdot [C] \quad (\text{SE3})$$

The derivatives at the collocation points of the functions contained in the matrix formulation in eq. (SE3) are evaluated by the following polynomials:

$$\left[ \frac{dc_1(z)}{dz} \quad \frac{dc_2(z)}{dz} \quad \frac{dc_3(z)}{dz} \quad \frac{d\phi(z)}{dz} \right] = [D] \cdot [C] \quad (\text{SE4})$$

$$\text{whereby: } [D] = [0 \ 1 \dots n \ z_1^{n-1}] [A]^{-1} \quad (\text{SE5})$$

Equations (SE3) and (SE4) were inserted in the differential-algebraic-equation system from equations (5) and (6). Given that the matrices  $[A]$  and  $[D]$  are known by the choice of the collocation points, the system was solved algebraically according to eq. (SE3) by resolving the matrix  $[C]$ .

## Appendix S2: Ion rejections in the membrane screening for DL and TS40 membrane

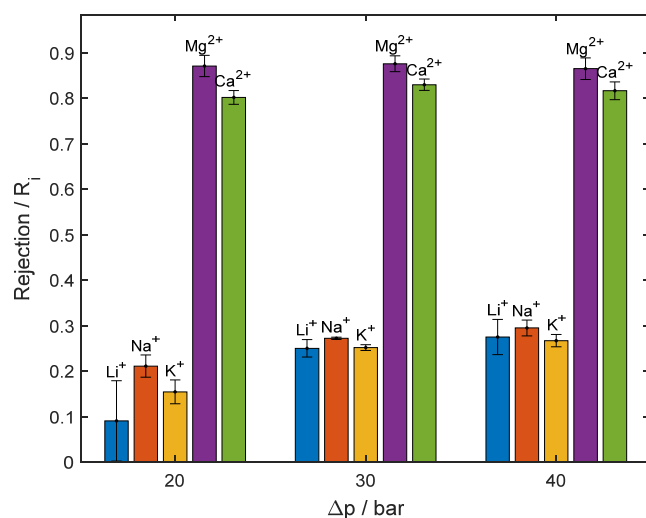

Figure S 1: Experimentally determined ion rejections for DL membrane at different pressure level. Colors denote to the five ion species. Error bars represent standard deviations estimated from four membrane cells. Conditions: Membrane: = DL (Suez),  $A_{\text{Mem}} = 17 \text{ cm}^2$ ,  $T = 20^\circ\text{C}$ ,  $\Delta p = 5\text{-}40 \text{ bar}$ ,  $\dot{m}_{\text{feed}} = 75 \text{ kg h}^{-1}$ . Feed concentrations according to Table 4 - STS.

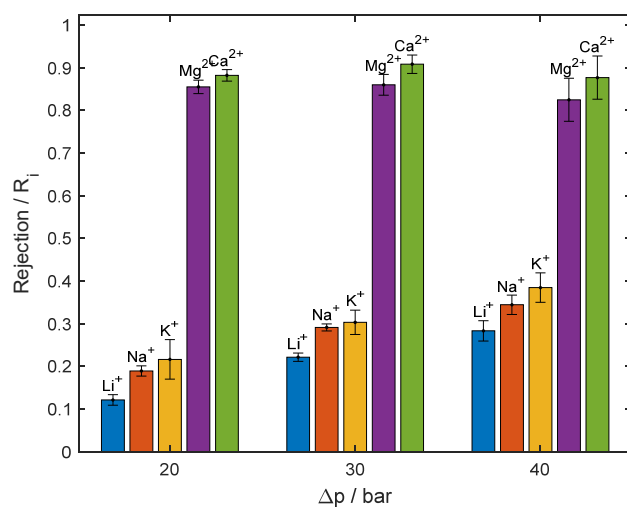

Figure S 2: Experimentally determined ion rejections for TS40 membrane at different pressure level. Colors denote to the five ion species. Error bars represent standard deviations estimated from four membrane cells. Conditions: Membrane: = TS40 (Mann+Hummel),  $A_{\text{Mem}} = 17 \text{ cm}^2$ ,  $T = 20^\circ\text{C}$ ,  $\Delta p = 5\text{-}40 \text{ bar}$ ,  $\dot{m}_{\text{feed}} = 75 \text{ kg h}^{-1}$ . Feed concentrations according to Table 4 - STS.

## Appendix S3 – experimental permeate flows and ion rejections

Table S1: Feed and permeate concentrations in mg kg<sup>-1</sup> with STS concentrations (c.f. Table 4) at different transmembrane pressure levels for Cell 1-4. Experiments were performed at a temperature of 20 °C and a feed mass flow rate of 75 kg h<sup>-1</sup> and the area of the used membrane TS40 is A = 17 cm<sup>2</sup>.

20 bar

|        | Li <sup>+</sup> | Na <sup>+</sup> | K <sup>+</sup> | Mg <sup>2+</sup> | Ca <sup>2+</sup> |
|--------|-----------------|-----------------|----------------|------------------|------------------|
| Feed   | 0.1773          | 11449.711       | 701.533        | 1527.716         | 505.575          |
| Cell 1 | 0.1570          | 9381.763        | 606.722        | 295.565          | 128.919          |
| Cell 2 | 0.1579          | 9848.208        | 643.043        | 259.740          | 118.850          |
| Cell 3 | 0.1556          | 9148.088        | 556.855        | 262.104          | 121.399          |
| Cell 4 | 0.1529          | 9250.688        | 599.567        | 271.713          | 119.33           |

30 bar

|        | Li <sup>+</sup> | Na <sup>+</sup> | K <sup>+</sup> | Mg <sup>2+</sup> | Ca <sup>2+</sup> |
|--------|-----------------|-----------------|----------------|------------------|------------------|
| Feed   | 0.1769          | 11620.837       | 713.338        | 1531.965         | 510.679          |
| Cell 1 | 0.1391          | 8350.893        | 519.192        | 303.433          | 125.116          |
| Cell 2 | 0.1358          | 8173.523        | 508.583        | 220.221          | 102.748          |
| Cell 3 | 0.1393          | 8350.922        | 516.072        | 264.532          | 114.481          |
| Cell 4 | 0.1367          | 8260.972        | 527.153        | 259.588          | 111.840]         |

40 bar

|        | Li <sup>+</sup> | Na <sup>+</sup> | K <sup>+</sup> | Mg <sup>2+</sup> | Ca <sup>2+</sup> |
|--------|-----------------|-----------------|----------------|------------------|------------------|
| Feed   | 0.1790          | 11041.060       | 683.600        | 1448.844         | 483.871          |
| Cell 1 | 0.1342          | 8019.365        | 481.474        | 411.142          | 160.490          |
| Cell 2 | 0.1278          | 7641.022        | 469.245        | 246.872          | 106.431          |
| Cell 3 | 0.1276          | 7537.242        | 463.546        | 292.860          | 121.196          |
| Cell 4 | 0.1238          | 7343.099        | 463.640        | 276.618          | 112.257          |

Table S2: Feed and permeate concentrations in mg kg<sup>-1</sup> with STS concentrations (c.f. Table 4) at different transmembrane pressure levels for Cell 1-4. Experiments were performed at a temperature of 20 °C and a feed mass flow rate of 75 kg h<sup>-1</sup> and the area of the used membrane ALNF is A = 17 cm<sup>2</sup>.

20 bar

|        | Li <sup>+</sup> | Na <sup>+</sup> | K <sup>+</sup> | Mg <sup>2+</sup> | Ca <sup>2+</sup> |
|--------|-----------------|-----------------|----------------|------------------|------------------|
| Feed   | 0.1370          | 10908.564       | 656.557        | 1400.178         | 452.036          |
| Cell 1 | 0.1557          | 9836.666        | 639.186        | 121.240          | 66.786           |
| Cell 2 | 0.1439          | 9770.855        | 611.300        | 108.984          | 60.382           |
| Cell 3 | 0.1316          | 9843.756        | 644.554        | 113.500          | 62.848           |
| Cell 4 | 0.1597          | 9654.802        | 633.709        | 129.567          | 64.212           |

30 bar

|        | Li <sup>+</sup> | Na <sup>+</sup> | K <sup>+</sup> | Mg <sup>2+</sup> | Ca <sup>2+</sup> |
|--------|-----------------|-----------------|----------------|------------------|------------------|
| Feed   | 0.1542          | 11428.153       | 681.779        | 1427.718         | 457.619          |
| Cell 1 | 0.1681          | 8841.591        | 570.353        | 112.157          | 58.321           |
| Cell 2 | 0.1291          | 8684.894        | 558.848        | 107.005          | 58.388           |
| Cell 3 | 0.1275          | 8908.654        | 575.066        | 115.259          | 64.055           |
| Cell 4 | 0.1228          | 8809.011        | 565.328        | 136.361          | 66.951           |

40 bar

|        | Li <sup>+</sup> | Na <sup>+</sup> | K <sup>+</sup> | Mg <sup>2+</sup> | Ca <sup>2+</sup> |
|--------|-----------------|-----------------|----------------|------------------|------------------|
| Feed   | 0.1515          | 11281.394       | 675.701        | 1399.753         | 450.009          |
| Cell 1 | 0.1204          | 8636.074        | 554.276        | 139.109          | 66.444           |
| Cell 2 | 0.2442          | 8250.358        | 536.853        | 122.396          | 62.656           |
| Cell 3 | 0.1260          | 8499.544        | 556.375        | 123.265          | 66.929           |
| Cell 4 | 0.1220          | 8402.824        | 548.268        | 161.570          | 77.636           |

Table S3: Feed and permeate concentrations in mg kg<sup>-1</sup> with STS concentrations (c.f. Table 4) at different transmembrane pressure levels for Cell 1-4. Experiments were performed at a temperature of 20 °C and a feed mass flow rate of 75 kg h<sup>-1</sup> and the area of the used membrane DL is A = 17 cm<sup>2</sup>.

20 bar

|        | Li <sup>+</sup> | Na <sup>+</sup> | K <sup>+</sup> | Mg <sup>2+</sup> | Ca <sup>2+</sup> |
|--------|-----------------|-----------------|----------------|------------------|------------------|
| Feed   | 0.1148          | 8622.447        | 522.712        | 1130.107         | 371.436          |
| Cell 1 | 0.8066          | 6490.119        | 421.555        | 150.998          | 75.011           |
| Cell 2 | 0.1115          | 6858.466        | 446.351        | 124.125          | 69.154           |
| Cell 3 | 0.1535          | 6904.971        | 449.386        | 125.871          | 68.899           |
| Cell 4 | 0.0972          | 6951.974        | 450.398        | 180.533          | 80.817           |

30 bar

|        | Li <sup>+</sup> | Na <sup>+</sup> | K <sup>+</sup> | Mg <sup>2+</sup> | Ca <sup>2+</sup> |
|--------|-----------------|-----------------|----------------|------------------|------------------|
| Feed   | 0.1219          | 8457.240        | 528.684        | 1105.307         | 362.781          |
| Cell 1 | 0.0883          | 6124.260        | 391.486        | 151.655          | 69.056           |
| Cell 2 | 0.0940          | 6167.809        | 399.595        | 119.147          | 58.523           |
| Cell 3 | 0.0919          | 6153.550        | 396.048        | 120.847          | 59.427           |
| Cell 4 | 0.0913          | 6167.123        | 394.753        | 155.151          | 66.841           |

40 bar

|        | Li <sup>+</sup> | Na <sup>+</sup> | K <sup>+</sup> | Mg <sup>2+</sup> | Ca <sup>2+</sup> |
|--------|-----------------|-----------------|----------------|------------------|------------------|
| Feed   | 0.1211          | 8367.517        | 511.009        | 1065.245         | 346.527          |
| Cell 1 | 0.0865          | 5740.683        | 367.300        | 154.976          | 66.582           |
| Cell 2 | 0.0944          | 5926.281        | 379.694        | 123.076          | 58.789           |
| Cell 3 | 0.0868          | 5838.960        | 369.786        | 121.492          | 56.931           |
| Cell 4 | 0.0834          | 6086.943        | 381.152        | 173.718          | 71.447           |

Table S4: Permeate fluxes in  $\text{g h}^{-1}$  and experimental rejections of the  $\text{Na}^+$  and  $\text{Li}^+$  ions of the subsystem with  $\text{Li}^+$  ions based in SW concentrations (31410  $\text{mg kg}^{-1}$  NaCl. 1.28  $\text{mg kg}^{-1}$  LiCl in MilliQ water). The experiments were performed at a temperature of 20 °C and a feed mass flow rate of 75  $\text{kg h}^{-1}$  and the area of the used membrane NFAL is  $A = 17 \text{ cm}^2$ .

**Subsystem NaCl + LiCl**

| <b>Permeate flow <math>\text{g h}^{-1}</math></b> | 45 bar  | 40 bar  | 35 bar  | 30 bar  | 25 bar  | 20 bar | 15 bar | 10 bar | 5 bar  |
|---------------------------------------------------|---------|---------|---------|---------|---------|--------|--------|--------|--------|
| Cell 1                                            | 202.890 | 171.042 | 135.882 | 117.804 | 95.352  | 77.832 | 51.312 | 38.304 | 23.142 |
| Cell 2                                            | 235.524 | 203.016 | 158.856 | 136.728 | 112.494 | 83.970 | 68.106 | 47.982 | 30.084 |
| Cell 3                                            | 217.788 | 189.066 | 144.822 | 123.108 | 101.136 | 79.260 | 57.138 | 41.454 | 30.510 |
| Cell 4                                            | 232.338 | 186.480 | 151.830 | 134.718 | 97.638  | 89.604 | 63.528 | 32.580 | 26.712 |

  

| <b>Rejection of <math>\text{Na}^+</math></b> | 45 bar | 40 bar | 35 bar | 30 bar | 25 bar | 20 bar | 15 bar | 10 bar | 5 bar |
|----------------------------------------------|--------|--------|--------|--------|--------|--------|--------|--------|-------|
| Cell 1                                       | 0.367  | 0.351  | 0.280  | 0.260  | 0.212  | 0.191  | 0.158  | 0.126  | 0.094 |
| Cell 2                                       | 0.374  | 0.345  | 0.267  | 0.261  | 0.199  | 0.202  | 0.131  | 0.105  | 0.086 |
| Cell 3                                       | 0.371  | 0.337  | 0.282  | 0.277  | 0.206  | 0.221  | 0.178  | 0.126  | 0.083 |
| Cell 4                                       | 0.350  | 0.329  | 0.270  | 0.276  | 0.200  | 0.201  | 0.157  | 0.104  | 0.073 |

  

| <b>Rejection of <math>\text{Li}^+</math></b> | 45 bar | 40 bar | 35 bar | 30 bar | 25 bar | 20 bar | 15 bar | 10 bar | 5 bar |
|----------------------------------------------|--------|--------|--------|--------|--------|--------|--------|--------|-------|
| Cell 1                                       | 0.330  | 0.282  | 0.261  | 0.182  | 0.177  | 0.176  | 0.163  | 0.073  | 0.081 |
| Cell 2                                       | 0.288  | 0.296  | 0.255  | 0.192  | 0.215  | 0.165  | 0.162  | 0.101  | 0.063 |
| Cell 3                                       | 0.273  | 0.286  | 0.263  | 0.225  | 0.185  | 0.165  | 0.148  | 0.087  | 0.046 |
| Cell 4                                       | 0.290  | 0.256  | -      | 0.206  | 0.161  | 0.163  | 0.138  | -      | 0.057 |

Table S5: Permeate fluxes in  $\text{g h}^{-1}$  and experimental rejections of the  $\text{Na}^+$  and  $\text{Mg}^{2+}$  ions of the subsystem with  $\text{Mg}^{2+}$  ions based in SW concentrations ( $31410 \text{ mg kg}^{-1}$  NaCl.  $6131 \text{ mg kg}^{-1}$   $\text{MgCl}_2$  in MilliQ water). The experiments were performed at a temperature of  $20^\circ\text{C}$  and a feed mass flow rate of  $75 \text{ kg h}^{-1}$  and the area of the used membrane NFAL is  $A = 17 \text{ cm}^2$ .

| <b>Subsystem NaCl + <math>\text{MgCl}_2</math></b> |         |         |         |        |        |        |        |        |
|----------------------------------------------------|---------|---------|---------|--------|--------|--------|--------|--------|
| <b>Permeate flow <math>\text{g h}^{-1}</math></b>  | 45 bar  | 40 bar  | 35 bar  | 25 bar | 20 bar | 15 bar | 10 bar | 5 bar  |
| Cell 1                                             | 189.624 | 157.680 | 127.572 | 88.098 | 68.826 | 54.156 | 38.112 | 11.616 |
| Cell 2                                             | 171.924 | 148.362 | 116.514 | 73.116 | 59.826 | 41.796 | 31.320 | 10.152 |
| Cell 3                                             | 183.804 | 152.376 | 125.166 | 92.892 | 73.584 | 50.772 | 43.680 | 13.452 |
| Cell 4                                             | 174.732 | 139.830 | 113.820 | 79.524 | 58.698 | 42.924 | 30.060 | 9.798  |
| <b>Rejection of <math>\text{Na}^+</math></b>       | 45 bar  | 40 bar  | 35 bar  | 25 bar | 20 bar | 15 bar | 10 bar | 5 bar  |
| Cell 1                                             | 0.385   | 0.354   | 0.284   | 0.199  | 0.158  | 0.085  | 0.065  | -0.044 |
| Cell 2                                             | 0.389   | 0.350   | 0.295   | 0.200  | 0.147  | 0.087  | 0.060  | -0.044 |
| Cell 3                                             | 0.367   | 0.329   | 0.282   | 0.185  | 0.127  | 0.074  | 0.026  | -0.017 |
| Cell 4                                             | 0.369   | 0.326   | 0.275   | 0.190  | 0.132  | 0.085  | 0.039  | -0.008 |
| <b>Rejection of <math>\text{Mg}^{2+}</math></b>    | 45 bar  | 40 bar  | 35 bar  | 25 bar | 20 bar | 15 bar | 10 bar | 5 bar  |
| Cell 1                                             | 0.963   | 0.963   | 0.954   | 0.957  | 0.950  | -      | 0.908  | 0.891  |
| Cell 2                                             | 0.965   | 0.966   | 0.964   | 0.961  | 0.956  | 0.950  | 0.944  | 0.894  |
| Cell 3                                             | 0.960   | 0.961   | 0.955   | 0.949  | 0.927  | 0.906  | -      | -      |
| Cell 4                                             | 0.967   | 0.965   | 0.960   | 0.957  | 0.948  | 0.948  | 0.938  | 0.895  |



Table S6: Permeate fluxes in  $\text{g h}^{-1}$  and experimental rejections of the  $\text{Na}^+$  and  $\text{K}^+$  ions of the subsystem with  $\text{K}^+$  ions based in SW concentrations ( $31410 \text{ mg kg}^{-1}$  NaCl.  $1425 \text{ mg kg}^{-1}$  KCl in MilliQ water). The experiments were performed at a temperature of  $20^\circ\text{C}$  and a feed mass flow rate of  $75 \text{ kg h}^{-1}$  and the area of the used membrane NFAL is  $A = 17 \text{ cm}^2$ .

| <b>Subsystem NaCl + KCl</b>                       |         |         |         |         |         |        |        |        |        |
|---------------------------------------------------|---------|---------|---------|---------|---------|--------|--------|--------|--------|
| <b>Permeate flow <math>\text{g h}^{-1}</math></b> | 45 bar  | 40 bar  | 35 bar  | 30 bar  | 25 bar  | 20 bar | 15 bar | 10 bar | 5 bar  |
| Cell 1                                            | 194.826 | 166.932 | 146.052 | 126.006 | 95.250  | 81.726 | 60.468 | 49.440 | 29.178 |
| Cell 2                                            | 200.418 | 171.738 | 154.110 | 141.480 | 100.752 | 92.928 | 69.144 | 62.544 | 33.426 |
| Cell 3                                            | 202.440 | 164.046 | 145.518 | 141.066 | 98.364  | 82.944 | 58.764 | 43.722 | 30.432 |
| Cell 4                                            | 184.980 | 154.992 | 137.040 | 129.006 | 86.766  | 79.938 | 51.042 | 51.252 | 23.820 |
| <b>Rejection of <math>\text{Na}^+</math></b>      | 45 bar  | 40 bar  | 35 bar  | 30 bar  | 25 bar  | 20 bar | 15 bar | 10 bar | 5 bar  |
| Cell 1                                            | 0.289   | 0.261   | 0.252   | 0.259   | 0.207   | 0.176  | 0.141  | 0.111  | 0.081  |
| Cell 2                                            | 0.293   | 0.252   | 0.264   | 0.252   | 0.186   | 0.169  | 0.155  | 0.108  | 0.071  |
| Cell 3                                            | 0.300   | 0.243   | 0.212   | 0.245   | 0.201   | 0.160  | 0.145  | 0.066  | 0.069  |
| Cell 4                                            | 0.294   | 0.215   | 0.240   | 0.245   | 0.202   | 0.168  | 0.166  | 0.082  | 0.068  |
| <b>Rejection of <math>\text{K}^+</math></b>       | 45 bar  | 40 bar  | 35 bar  | 30 bar  | 25 bar  | 20 bar | 15 bar | 10 bar | 5 bar  |
| Cell 1                                            | 0.299   | 0.246   | 0.241   | 0.243   | 0.176   | 0.171  | 0.118  | 0.067  | 0.059  |
| Cell 2                                            | 0.304   | 0.247   | 0.239   | 0.247   | 0.163   | 0.146  | 0.114  | 0.064  | 0.020  |
| Cell 3                                            | 0.314   | 0.236   | 0.190   | 0.235   | 0.181   | 0.238  | 0.113  | 0.041  | 0.000  |
| Cell 4                                            | 0.304   | 0.207   | 0.221   | 0.238   | 0.183   | 0.139  | 0.141  | 0.047  | 0.003  |

Table S7: Permeate fluxes in  $\text{g h}^{-1}$  and experimental rejections of the  $\text{Na}^+$  and  $\text{Ca}^{2+}$  ions of the subsystem with  $\text{Ca}^{2+}$  ions based in SW concentrations ( $31410 \text{ mg kg}^{-1}$  NaCl.  $1339 \text{ mg kg}^{-1}$   $\text{CaCl}_2$  in MilliQ water). The experiments were performed at a temperature of  $20^\circ\text{C}$  and a feed mass flow rate of  $75 \text{ kg h}^{-1}$  and the area of the used membrane NFAL is  $A = 17 \text{ cm}^2$ .

**Subsystem NaCl +  $\text{CaCl}_2$**

| <b>Permeate flow <math>\text{g h}^{-1}</math></b> | 45 bar  | 40 bar  | 35 bar  | 30 bar  | 25 bar  | 20 bar | 15 bar | 10 bar | 5 bar  |
|---------------------------------------------------|---------|---------|---------|---------|---------|--------|--------|--------|--------|
| Cell 1                                            | 231.186 | 189.750 | 163.482 | 133.146 | 114.888 | 80.724 | 69.594 | 49.530 | 27.918 |
| Cell 2                                            | 254.328 | 200.802 | 179.856 | 142.716 | 121.134 | 85.536 | 79.644 | 42.042 | 30.066 |
| Cell 3                                            | 240.468 | 207.162 | 172.872 | 142.842 | 123.354 | 78.708 | 72.606 | 44.598 | 21.888 |
| Cell 4                                            | 232.062 | 190.308 | 164.946 | 134.598 | 112.008 | 79.914 | 65.088 | 46.338 | 28.536 |
| <b>Rejection of <math>\text{Na}^+</math></b>      | 45 bar  | 40 bar  | 35 bar  | 30 bar  | 25 bar  | 20 bar | 15 bar | 10 bar | 5 bar  |
| Cell 1                                            | 0.393   | 0.355   | 0.324   | 0.271   | 0.235   | 0.178  | 0.217  | 0.171  | 0.081  |
| Cell 2                                            | 0.378   | 0.347   | 0.327   | 0.259   | 0.249   | 0.186  | 0.218  | 0.152  | 0.082  |
| Cell 3                                            | 0.370   | 0.344   | 0.325   | 0.248   | 0.234   | 0.171  | 0.181  | 0.126  | 0.093  |
| Cell 4                                            | 0.368   | 0.336   | 0.319   | 0.210   | 0.238   | 0.152  | 0.193  | 0.116  | 0.090  |
| <b>Rejection of <math>\text{Ca}^{2+}</math></b>   | 45 bar  | 40 bar  | 35 bar  | 30 bar  | 25 bar  | 20 bar | 15 bar | 10 bar | 5 bar  |
| Cell 1                                            | 0.879   | 0.872   | 0.867   | 0.854   | 0.843   | 0.821  | 0.787  | 0.776  | 0.694  |
| Cell 2                                            | 0.872   | 0.870   | 0.874   | 0.847   | 0.864   | 0.838  | 0.848  | 0.817  | 0.765  |
| Cell 3                                            | 0.865   | 0.868   | 0.863   | 0.836   | 0.851   | 0.826  | 0.822  | 0.790  | 0.763  |
| Cell 4                                            | 0.872   | 0.865   | 0.869   | 0.827   | 0.859   | 0.827  | 0.811  | 0.764  | 0.738  |

Table S8: Permeate fluxes in  $\text{g h}^{-1}$  and experimental rejections of the  $\text{Na}^+$  and  $\text{SO}_4^{2-}$  ions of the subsystem with  $\text{SO}_4^{2-}$  ions based in SW concentrations ( $35173 \text{ mg kg}^{-1}$  NaCl.  $3917 \text{ mg kg}^{-1}$   $\text{Na}_2\text{SO}_4$  in MilliQ water). The experiments were performed at a temperature of  $20^\circ\text{C}$  and a feed mass flow rate of  $75 \text{ kg h}^{-1}$  and the area of the used membrane NFAL is  $A = 17 \text{ cm}^2$ .

**Subsystem NaCl+Na<sub>2</sub>SO<sub>4</sub>**

| <b>Permeate flow <math>\text{g h}^{-1}</math></b> | 45 bar  | 40 bar  | 35 bar  | 25 bar  | 20 bar | 15 bar | 10 bar | 5 bar  |
|---------------------------------------------------|---------|---------|---------|---------|--------|--------|--------|--------|
| Cell 1                                            | 216.000 | 163.140 | 139.746 | 95.766  | 64.842 | 44.652 | 33.012 | 16.554 |
| Cell 2                                            | 247.680 | 186.600 | 160.998 | 114.294 | 78.990 | 59.700 | 25.140 | 22.422 |
| Cell 3                                            | 224.376 | 168.876 | 147.204 | 99.372  | 65.622 | 47.670 | 27.624 | 14.712 |
| Cell 4                                            | 242.580 | 184.842 | 159.294 | 109.464 | 78.126 | 53.646 | 35.916 | 16.158 |
| <b>Rejection of <math>\text{Cl}^-</math></b>      | 45 bar  | 40 bar  | 35 bar  | 25 bar  | 20 bar | 15 bar | 10 bar | 5 bar  |
| Cell 1                                            | 0.358   | 0.309   | 0.277   | 0.238   | 0.174  | 0.117  | 0.086  | 0.019  |
| Cell 2                                            | 0.344   | 0.308   | 0.273   | 0.242   | 0.143  | 0.118  | 0.084  | 0.021  |
| Cell 3                                            | 0.350   | 0.295   | 0.254   | 0.236   | 0.147  | 0.125  | 0.090  | 0.015  |
| Cell 4                                            | 0.354   | 0.292   | 0.275   | 0.227   | 0.136  | 0.098  | 0.077  | 0.003  |
| <b>Rejection of <math>\text{SO}_4^{2-}</math></b> | 45 bar  | 40 bar  | 35 bar  | 25 bar  | 20 bar | 15 bar | 10 bar | 5 bar  |
| Cell 1                                            | 0.976   | 0.961   | 0.954   | 0.963   | 0.959  | 0.945  | 0.944  | 0.913  |
| Cell 2                                            | 0.991   | 0.995   | 0.995   | 0.995   | 0.976  | 0.915  | 0.936  | 0.974  |
| Cell 3                                            | 0.997   | 0.999   | 0.998   | 0.997   | 0.996  | 0.995  | 0.994  | 0.990  |
| Cell 4                                            | 0.995   | 0.997   | 0.997   | 0.993   | 0.988  | 0.949  | 0.987  | 0.991  |

Table S9: Permeate fluxes in  $\text{g h}^{-1}$  and experimental rejections of the ME-SW feed concentrations (c.f. Table 4) The experiments were performed at a temperature of 20 °C and a feed mass flow rate of  $75 \text{ kg h}^{-1}$  and the area of the used membrane NFAL is  $A = 17 \text{ cm}^2$ .

| <b>MW-Feed</b>                                       |         |         |         |        |        |        |        |        |        |
|------------------------------------------------------|---------|---------|---------|--------|--------|--------|--------|--------|--------|
| <b>Permeate flow in <math>\text{g h}^{-1}</math></b> | 45 bar  | 40 bar  | 35 bar  | 30 bar | 25 bar | 20 bar | 15 bar | 10 bar | 5 bar  |
| Cell 1                                               | 165.972 | 138.498 | 110.448 | 80.358 | 63.816 | 60.330 | 37.728 | 28.074 | 13.824 |
| Cell 2                                               | 172.380 | 141.384 | 110.784 | 84.702 | 71.730 | 54.918 | 38.052 | 27.702 | 13.338 |
| Cell 3                                               | 164.118 | 142.158 | 112.398 | 85.752 | 67.464 | 58.560 | 35.028 | 29.754 | 13.806 |
| Cell 4                                               | 156.474 | 151.170 | 104.526 | 77.298 | 61.572 | 55.416 | 36.503 | 30.180 | 11.118 |
| <b>Rejection of <math>\text{Na}^+</math></b>         | 45 bar  | 40 bar  | 35 bar  | 30 bar | 25 bar | 20 bar | 15 bar | 10 bar | 5 bar  |
| Cell 1                                               | 0.381   | 0.333   | 0.259   | 0.190  | 0.133  | 0.096  | 0.061  | -0.027 | -0.071 |
| Cell 2                                               | 0.373   | 0.311   | 0.265   | 0.180  | 0.120  | 0.099  | 0.043  | -0.014 | -0.083 |
| Cell 3                                               | 0.341   | 0.289   | 0.240   | 0.161  | 0.094  | 0.082  | 0.029  | -0.001 | -0.021 |
| Cell 4                                               | 0.357   | 0.297   | 0.242   | 0.173  | 0.121  | 0.108  | 0.063  | 0.004  | -0.086 |
| <b>Rejection of <math>\text{Li}^+</math></b>         | 45 bar  | 40 bar  | 35 bar  | 30 bar | 25 bar | 20 bar | 15 bar | 10 bar | 5 bar  |
| Cell 1                                               | 0.221   | 0.197   | 0.163   | 0.076  | 0.127  | -0.019 | 0.060  | 0.011  | -0.046 |
| Cell 2                                               | 0.224   | 0.180   | 0.170   | -      | 0.071  | 0.085  | -0.009 | 0.018  | -0.054 |
| Cell 3                                               | 0.232   | 0.147   | 0.165   | 0.061  | 0.034  | 0.004  | 0.000  | -0.003 | 0.003  |
| Cell 4                                               | -       | 0.175   | 0.124   | 0.092  | 0.049  | 0.064  | -0.010 | -0.065 | -0.029 |

| <b>Rejection of Mg<sup>2+</sup></b> | 45 bar | 40 bar | 35 bar | 30 bar | 25 bar | 20 bar | 15 bar | 10 bar | 5 bar  |
|-------------------------------------|--------|--------|--------|--------|--------|--------|--------|--------|--------|
| Cell 1                              | 0.963  | 0.961  | 0.955  | 0.947  | 0.950  | 0.944  | 0.933  | 0.914  | 0.851  |
| Cell 2                              | 0.960  | 0.961  | 0.959  | 0.955  | 0.950  | 0.947  | 0.934  | 0.930  | 0.886  |
| Cell 3                              | 0.948  | 0.943  | 0.942  | 0.939  | 0.925  | 0.928  | 0.915  | 0.896  | 0.882  |
| Cell 4                              | 0.960  | 0.955  | 0.958  | 0.948  | 0.947  | 0.942  | 0.926  | 0.908  | 0.880  |
| <b>Rejection of K<sup>+</sup></b>   | 45 bar | 40 bar | 35 bar | 30 bar | 25 bar | 20 bar | 15 bar | 10 bar | 5 bar  |
| Cell 1                              | 0.395  | 0.353  | 0.262  | 0.177  | 0.168  | 0.117  | 0.052  | -0.001 | -0.118 |
| Cell 2                              | 0.360  | 0.329  | 0.282  | 0.211  | 0.161  | 0.116  | 0.030  | 0.030  | -0.090 |
| Cell 3                              | 0.373  | 0.314  | 0.257  | 0.212  | 0.145  | 0.105  | 0.015  | -0.053 | -0.018 |
| Cell 4                              | 0.377  | 0.307  | 0.278  | 0.181  | 0.153  | 0.114  | -0.021 | -0.084 | -0.032 |
| <b>Rejection of Ca<sup>2+</sup></b> | 45 bar | 40 bar | 35 bar | 30 bar | 25 bar | 20 bar | 15 bar | 10 bar | 5 bar  |
| Cell 1                              | 0.876  | 0.870  | 0.853  | 0.838  | 0.847  | 0.833  | 0.804  | 0.776  | 0.663  |
| Cell 2                              | 0.871  | 0.863  | 0.864  | 0.855  | 0.844  | 0.829  | 0.803  | 0.791  | 0.681  |
| Cell 3                              | 0.864  | 0.848  | 0.851  | 0.839  | 0.816  | 0.815  | 0.787  | 0.751  | 0.714  |
| Cell 4                              | 0.871  | 0.854  | 0.856  | 0.835  | 0.837  | 0.816  | 0.792  | 0.754  | 0.669  |

Table S10: Permeate fluxes in  $\text{g h}^{-1}$  and experimental rejections of the  $\text{Na}^+$  and  $\text{Li}^+$  ions of the subsystem with  $\text{Li}^+$  ions based in ROB concentrations ( $60881 \text{ mg kg}^{-1}$  NaCl.  $2.44 \text{ mg kg}^{-1}$  LiCl in MilliQ water). The experiments were performed at a temperature of  $20^\circ\text{C}$  and a feed mass flow rate of  $75 \text{ kg h}^{-1}$  and the area of the used membrane NFAL is  $A = 17 \text{ cm}^2$ .

| <b>Subsystem NaCl+LiCl</b>                           |         |         |         |        |        |        |        |        |
|------------------------------------------------------|---------|---------|---------|--------|--------|--------|--------|--------|
| <b>Permeate flow in <math>\text{g h}^{-1}</math></b> | 45 bar  | 40 bar  | 35 bar  | 25 bar | 20 bar | 15 bar | 10 bar | 5 bar  |
| Cell 1                                               | 167.844 | 146.184 | 128.856 | 83.778 | 67.830 | 50.730 | 38.928 | 20.220 |
| Cell 2                                               | 178.734 | 161.028 | 144.822 | 94.278 | 72.834 | 51.324 | 40.968 | 20.832 |
| Cell 3                                               | 165.354 | 143.640 | 124.080 | 79.860 | 68.376 | 46.074 | 35.076 | 20.748 |
| Cell 4                                               | 185.820 | 146.580 | 130.872 | 99.504 | 64.470 | 61.740 | 34.464 | 19.200 |
| <b>Rejection of <math>\text{Na}^+</math></b>         | 45 bar  | 40 bar  | 35 bar  | 25 bar | 20 bar | 15 bar | 10 bar | 5 bar  |
| Cell 1                                               | 0.309   | 0.284   | 0.268   | 0.221  | 0.182  | 0.145  | 0.118  | 0.064  |
| Cell 2                                               | 0.302   | 0.276   | 0.264   | 0.222  | 0.181  | 0.145  | 0.120  | 0.061  |
| Cell 3                                               | 0.295   | 0.269   | 0.260   | 0.217  | 0.175  | 0.140  | 0.112  | 0.062  |
| Cell 4                                               | 0.300   | 0.279   | 0.269   | 0.204  | 0.158  | 0.124  | 0.106  | 0.057  |
| <b>Rejection of <math>\text{Li}^+</math></b>         | 45 bar  | 40 bar  | 35 bar  | 25 bar | 20 bar | 15 bar | 10 bar | 5 bar  |
| Cell 1                                               | 0.292   | 0.216   | 0.163   | -      | 0.133  | 0.121  | 0.006  | 0.041  |
| Cell 2                                               | 0.202   | 0.203   | 0.209   | 0.103  | 0.129  | 0.114  | 0.055  | -0.038 |
| Cell 3                                               | 0.234   | 0.248   | 0.233   | 0.165  | 0.124  | 0.093  | 0.030  | -0.062 |
| Cell 4                                               | 0.257   | 0.227   | -       | 0.101  | 0.122  | 0.094  | -      | -0.058 |

Table S11: Permeate fluxes in  $\text{g h}^{-1}$  and experimental rejections of the  $\text{Na}^+$  and  $\text{Mg}^{2+}$  ions of the subsystem with  $\text{Mg}^{2+}$  ions based in ROB concentrations ( $60881 \text{ mg kg}^{-1}$  NaCl.  $6131 \text{ mg kg}^{-1}$   $\text{MgCl}_2$  in MilliQ water). The experiments were performed at a temperature of  $20^\circ\text{C}$  and a feed mass flow rate of  $75 \text{ kg h}^{-1}$  and the area of the used membrane NFAL is  $A = 17 \text{ cm}^2$ .

| <b>Subsystem NaCl+<math>\text{MgCl}_2</math></b>     |         |        |        |        |        |        |        |        |
|------------------------------------------------------|---------|--------|--------|--------|--------|--------|--------|--------|
| <b>Permeate flow in <math>\text{g h}^{-1}</math></b> | 45 bar  | 40 bar | 35 bar | 25 bar | 20 bar | 15 bar | 10 bar | 5 bar  |
| Cell 1                                               | 98.436  | 90.468 | 73.488 | 52.578 | 45.108 | 25.458 | 19.950 | 6.912  |
| Cell 2                                               | 112.404 | 98.796 | 82.644 | 60.606 | 44.724 | 30.108 | 19.668 | 7.290  |
| Cell 3                                               | 103.590 | 95.964 | 80.136 | 55.440 | 40.254 | 28.776 | 14.484 | 8.382  |
| Cell 4                                               | 114.876 | 94.554 | 85.350 | 57.054 | 48.012 | 36.840 | 22.422 | 8.010  |
| <b>Rejection of <math>\text{Na}^+</math></b>         | 45 bar  | 40 bar | 35 bar | 25 bar | 20 bar | 15 bar | 10 bar | 5 bar  |
| Cell 1                                               | 0.241   | 0.213  | 0.183  | 0.107  | 0.088  | 0.029  | -0.031 | -0.070 |
| Cell 2                                               | 0.253   | 0.212  | 0.170  | 0.110  | 0.069  | 0.031  | -0.061 | -0.072 |
| Cell 3                                               | 0.226   | 0.206  | 0.175  | 0.112  | 0.089  | -0.003 | -0.042 | -0.056 |
| Cell 4                                               | 0.230   | 0.195  | 0.180  | 0.118  | 0.075  | -0.027 | -0.033 | -0.074 |
| <b>Rejection of <math>\text{Mg}^{2+}</math></b>      | 45 bar  | 40 bar | 35 bar | 25 bar | 20 bar | 15 bar | 10 bar | 5 bar  |
| Cell 1                                               | 0.926   | 0.924  | 0.933  | 0.915  | 0.919  | 0.895  | 0.847  | 0.745  |
| Cell 2                                               | 0.953   | 0.950  | 0.946  | 0.931  | 0.903  | 0.822  | 0.827  | 0.776  |
| Cell 3                                               | 0.934   | 0.933  | 0.932  | 0.925  | 0.920  | 0.895  | 0.858  | 0.779  |
| Cell 4                                               | 0.940   | 0.943  | 0.937  | 0.927  | 0.897  | -      | 0.815  | 0.727  |

Table S12: Permeate fluxes in  $\text{g h}^{-1}$  and experimental rejections of the  $\text{Na}^+$  and  $\text{K}^+$  ions of the subsystem with  $\text{K}^+$  ions based in ROB concentrations ( $60881 \text{ mg kg}^{-1}$  NaCl.  $1526 \text{ mg kg}^{-1}$  KCl in MilliQ water). The experiments were performed at a temperature of  $20^\circ\text{C}$  and a feed mass flow rate of  $75 \text{ kg h}^{-1}$  and the area of the used membrane NFAL is  $A = 17 \text{ cm}^2$ .

| <b>Subsystem NaCl+KCl</b>                            |         |         |         |        |        |        |        |        |
|------------------------------------------------------|---------|---------|---------|--------|--------|--------|--------|--------|
| <b>Permeate flow in <math>\text{g h}^{-1}</math></b> | 45 bar  | 40 bar  | 35 bar  | 25 bar | 20 bar | 15 bar | 10 bar | 5 bar  |
| Cell 1                                               | 184.098 | 157.794 | 125.058 | 93.024 | 71.322 | 53.688 | 42.978 | 26.442 |
| Cell 2                                               | 148.896 | 128.934 | 105.534 | 77.280 | 56.580 | 49.512 | 36.246 | 18.006 |
| Cell 3                                               | 137.982 | 113.634 | 92.778  | 69.504 | 56.850 | 41.964 | 32.766 | 16.830 |
| Cell 4                                               | 143.844 | 129.708 | 73.626  | 73.626 | 49.236 | 41.664 | 35.328 | 19.860 |
| <b>Rejections of <math>\text{Na}^+</math></b>        | 45 bar  | 40 bar  | 35 bar  | 25 bar | 20 bar | 15 bar | 10 bar | 5 bar  |
| Cell 1                                               | 0.182   | 0.169   | 0.134   | 0.123  | 0.111  | 0.078  | 0.071  | 0.047  |
| Cell 2                                               | 0.265   | 0.236   | 0.198   | 0.173  | 0.141  | 0.108  | 0.086  | 0.059  |
| Cell 3                                               | 0.247   | 0.220   | 0.187   | 0.160  | 0.124  | 0.103  | 0.081  | 0.055  |
| Cell 4                                               | 0.246   | 0.220   | 0.186   | 0.162  | 0.128  | 0.102  | 0.083  | 0.051  |
| <b>Rejections of <math>\text{K}^+</math></b>         | 45 bar  | 40 bar  | 35 bar  | 25 bar | 20 bar | 15 bar | 10 bar | 5 bar  |
| Cell 1                                               | 0.213   | 0.195   | 0.159   | 0.140  | 0.127  | 0.082  | 0.074  | 0.047  |
| Cell 2                                               | 0.247   | 0.228   | 0.194   | 0.166  | 0.133  | 0.099  | 0.074  | 0.051  |
| Cell 3                                               | 0.242   | 0.217   | 0.174   | 0.143  | 0.117  | 0.095  | 0.070  | 0.047  |
| Cell 4                                               | 0.236   | 0.212   | 0.185   | 0.149  | 0.123  | 0.094  | 0.076  | 0.043  |



Table S13: Permeate fluxes in  $\text{g h}^{-1}$  and experimental rejections of the  $\text{Na}^+$  and  $\text{Ca}^{2+}$  ions of the subsystem with  $\text{Ca}^{2+}$  ions based in ROB concentrations ( $60881 \text{ mg kg}^{-1} \text{ NaCl}$ .  $2206 \text{ mg kg}^{-1} \text{ CaCl}_2$  in MilliQ water). The experiments were performed at a temperature of  $20^\circ\text{C}$  and a feed mass flow rate of  $75 \text{ kg h}^{-1}$  and the area of the used membrane NFAL is  $A = 17 \text{ cm}^2$ .

| <b>Subsystem NaCl + <math>\text{CaCl}_2</math></b>   |         |         |         |        |        |        |        |        |
|------------------------------------------------------|---------|---------|---------|--------|--------|--------|--------|--------|
| <b>Permeate flow in <math>\text{g h}^{-1}</math></b> | 45 bar  | 40 bar  | 35 bar  | 25 bar | 20 bar | 15 bar | 10 bar | 5 bar  |
| Cell 1                                               | 140.754 | 122.970 | 105.060 | 74.352 | 60.582 | 43.308 | 30.852 | 17.004 |
| Cell 2                                               | 151.164 | 129.642 | 116.970 | 87.228 | 59.628 | 49.200 | 34.014 | 18.366 |
| Cell 3                                               | 135.126 | 125.088 | 104.868 | 66.396 | 65.316 | 40.632 | 21.690 | 14.772 |
| Cell 4                                               | 159.780 | 138.246 | 113.970 | 84.162 | 69.510 | 55.656 | 34.062 | 12.540 |
| <b>Rejection of <math>\text{Na}^+</math></b>         | 45 bar  | 40 bar  | 35 bar  | 25 bar | 20 bar | 15 bar | 10 bar | 5 bar  |
| Cell 1                                               | 0.456   | 0.418   | 0.396   | 0.257  | 0.205  | 0.257  | 0.193  | 0.107  |
| Cell 2                                               | 0.418   | 0.416   | 0.314   | 0.242  | 0.159  | 0.236  | 0.197  | 0.145  |
| Cell 3                                               | 0.461   | 0.374   | 0.346   | 0.238  | 0.170  | 0.220  | 0.150  | 0.112  |
| Cell 4                                               | 0.360   | 0.370   | 0.282   | 0.234  | 0.216  | 0.218  | 0.127  | 0.155  |
| <b>Rejection of <math>\text{Ca}^{2+}</math></b>      | 45 bar  | 40 bar  | 35 bar  | 25 bar | 20 bar | 15 bar | 10 bar | 5 bar  |
| Cell 1                                               | 0.920   | 0.913   | 0.909   | 0.874  | 0.853  | 0.817  | 0.802  | 0.715  |
| Cell 2                                               | 0.907   | 0.913   | 0.902   | 0.893  | 0.860  | 0.880  | 0.852  | 0.802  |
| Cell 3                                               | 0.911   | 0.901   | 0.895   | 0.880  | 0.852  | 0.857  | 0.819  | 0.788  |
| Cell 4                                               | 0.898   | 0.900   | 0.891   | 0.887  | 0.867  | 0.841  | 0.787  | 0.774  |

Table S14: Permeate fluxes in  $\text{g h}^{-1}$  and experimental rejections of the  $\text{Na}^+$  and  $\text{SO}_4^{2-}$  ions of the subsystem with  $\text{SO}_4^{2-}$  ions based in ROB concentrations (66789  $\text{mg kg}^{-1}$  NaCl. 7834  $\text{mg kg}^{-1}$   $\text{CaCl}_2$  in MilliQ water). The experiments were performed at a temperature of 20 °C and a feed mass flow rate of 75  $\text{kg h}^{-1}$  and the area of the used membrane NFAL is  $A = 17 \text{ cm}^2$ .

| <b>Subsystem NaCl + <math>\text{Na}_2\text{SO}_4</math></b> |         |         |         |        |        |        |        |        |
|-------------------------------------------------------------|---------|---------|---------|--------|--------|--------|--------|--------|
| <b>Permeate flow in <math>\text{g h}^{-1}</math></b>        | 45 bar  | 40 bar  | 35 bar  | 25 bar | 20 bar | 15 bar | 10 bar | 5 bar  |
| Cell 1                                                      | 135.876 | 114.942 | 96.156  | 57.438 | 49.056 | 35.520 | 21.978 | 12.126 |
| Cell 2                                                      | 150.972 | 122.844 | 104.364 | 63.006 | 59.370 | 53.910 | 27.816 | 12.318 |
| Cell 3                                                      | 139.446 | 113.184 | 91.674  | 65.556 | 48.000 | 39.024 | 23.130 | 10.920 |
| Cell 4                                                      | 154.590 | 141.828 | 111.030 | 60.906 | 52.416 | 39.036 | 25.308 | 11.946 |
| <b>Rejection of <math>\text{Cl}^-</math></b>                | 45 bar  | 40 bar  | 35 bar  | 25 bar | 20 bar | 15 bar | 10 bar | 5 bar  |
| Cell 1                                                      | 0.260   | 0.206   | 0.188   | 0.126  | 0.110  | 0.070  | 0.043  | 0.006  |
| Cell 2                                                      | 0.255   | 0.203   | 0.187   | 0.124  | 0.108  | 0.055  | 0.033  | -0.003 |
| Cell 3                                                      | 0.254   | 0.190   | 0.179   | 0.118  | 0.100  | 0.063  | 0.036  | 0.002  |
| Cell 4                                                      | 0.250   | 0.193   | 0.179   | 0.119  | 0.095  | 0.058  | 0.034  | 0.001  |
| <b>Rejection of <math>\text{SO}_4^{2-}</math></b>           | 45 bar  | 40 bar  | 35 bar  | 25 bar | 20 bar | 15 bar | 10 bar | 5 bar  |
| Cell 1                                                      | 0.977   | 0.983   | 0.976   | 0.954  | 0.959  | 0.965  | 0.981  | 0.977  |
| Cell 2                                                      | 0.990   | 0.996   | 0.998   | 0.992  | 0.959  | 0.965  | 0.935  | 0.972  |
| Cell 3                                                      | 0.990   | 0.994   | 0.997   | 0.997  | 0.996  | 0.994  | 0.989  | 0.986  |
| Cell 4                                                      | 0.993   | 0.994   | 0.993   | 0.994  | 0.982  | 0.965  | 0.981  | 0.987  |

Table S15: Permeate fluxes in  $\text{g h}^{-1}$  and experimental rejections of the ME-ROB feed concentrations (c.f. Table 4) The experiments were performed at a temperature of 20 °C and a feed mass flow rate of  $75 \text{ kg h}^{-1}$  and the area of the used membrane NFAL is  $A = 17 \text{ cm}^2$

| <b>ME-ROB-Feed</b>                                   |         |        |        |        |        |        |        |        |
|------------------------------------------------------|---------|--------|--------|--------|--------|--------|--------|--------|
| <b>Permeate flow in <math>\text{g h}^{-1}</math></b> | 45 bar  | 40 bar | 35 bar | 25 bar | 20 bar | 15 bar | 10 bar | 5 bar  |
| Cell 1                                               | 93.822  | 78.030 | 61.674 | 40.056 | 30.444 | 23.340 | 16.362 | 6.648  |
| Cell 2                                               | 106.212 | 90.432 | 68.058 | 49.272 | 36.606 | 28.746 | 15.486 | 7.026  |
| Cell 3                                               | 93.654  | 80.268 | 58.098 | 43.848 | 28.020 | 22.710 | 15.972 | 5.820  |
| Cell 4                                               | 111.672 | 86.334 | 70.068 | 45.150 | 35.778 | 29.100 | 13.590 | 5.922  |
| <b>Rejection of <math>\text{Na}^+</math></b>         | 45 bar  | 40 bar | 35 bar | 25 bar | 20 bar | 15 bar | 10 bar | 5 bar  |
| Cell 1                                               | 0.252   | 0.206  | 0.156  | 0.054  | 0.013  | -0.011 | -0.023 | -0.058 |
| Cell 2                                               | 0.246   | 0.209  | 0.161  | 0.052  | 0.014  | -0.021 | -0.036 | -0.070 |
| Cell 3                                               | 0.242   | 0.197  | 0.150  | 0.045  | 0.001  | -0.017 | -0.026 | -0.062 |
| Cell 4                                               | 0.248   | 0.198  | 0.144  | 0.047  | 0.005  | -0.011 | -0.025 | -0.049 |
| <b>Rejection of <math>\text{Li}^+</math></b>         | 45 bar  | 40 bar | 35 bar | 25 bar | 20 bar | 15 bar | 10 bar | 5 bar  |
| Cell 1                                               | 0.087   | 0.043  | 0.023  | -0.047 | -0.061 | -0.067 | -0.066 | -0.059 |
| Cell 2                                               | 0.012   | 0.030  | 0.022  | -0.037 | -0.062 | -0.044 | -0.038 | -0.043 |
| Cell 3                                               | -       | 0.017  | -0.018 | -0.051 | -0.048 | -0.081 | -0.058 | -0.056 |
| Cell 4                                               | 0.058   | 0.033  | -0.005 | -0.038 | -0.080 | -0.054 | -0.065 | -0.043 |
| <b>Rejection of <math>\text{Mg}^{2+}</math></b>      | 45 bar  | 40 bar | 35 bar | 25 bar | 20 bar | 15 bar | 10 bar | 5 bar  |
| Cell 1                                               | 0.938   | 0.934  | 0.927  | 0.911  | 0.880  | 0.877  | 0.850  | 0.773  |
| Cell 2                                               | 0.941   | 0.941  | 0.938  | 0.918  | 0.890  | 0.825  | 0.860  | 0.772  |
| Cell 3                                               | 0.940   | 0.939  | 0.929  | 0.913  | 0.891  | 0.878  | 0.864  | 0.761  |
| Cell 4                                               | 0.940   | 0.942  | 0.931  | 0.895  | 0.853  | 0.693  | 0.703  | 0.698  |
| <b>Rejection of <math>\text{K}^+</math></b>          | 45 bar  | 40 bar | 35 bar | 25 bar | 20 bar | 15 bar | 10 bar | 5 bar  |

|        |       |       |       |       |       |       |        |        |
|--------|-------|-------|-------|-------|-------|-------|--------|--------|
| Cell 1 | 0.248 | 0.213 | 0.167 | 0.074 | 0.038 | 0.011 | -0.002 | -0.038 |
| Cell 2 | 0.236 | 0.216 | 0.171 | 0.074 | 0.035 | 0.003 | -0.015 | -0.051 |
| Cell 3 | 0.231 | 0.205 | 0.152 | 0.068 | 0.024 | 0.006 | -0.015 | -0.044 |
| Cell 4 | 0.248 | 0.206 | 0.157 | 0.068 | 0.027 | 0.004 | -0.007 | -0.030 |

| <b>Rejection of Ca<sup>2+</sup></b> | 45 bar | 40 bar | 35 bar | 25 bar | 20 bar | 15 bar | 10 bar | 5 bar |
|-------------------------------------|--------|--------|--------|--------|--------|--------|--------|-------|
| Cell 1                              | 0.921  | 0.911  | 0.892  | 0.842  | 0.781  | 0.751  | 0.706  | 0.525 |
| Cell 2                              | 0.926  | 0.923  | 0.910  | 0.854  | 0.798  | 0.708  | 0.707  | 0.485 |
| Cell 3                              | 0.917  | 0.912  | 0.890  | 0.833  | 0.781  | 0.750  | 0.715  | 0.480 |
| Cell 4                              | 0.926  | 0.921  | 0.899  | 0.820  | 0.759  | 0.586  | 0.569  | 0.470 |

## Appendix S4: Circular METcell

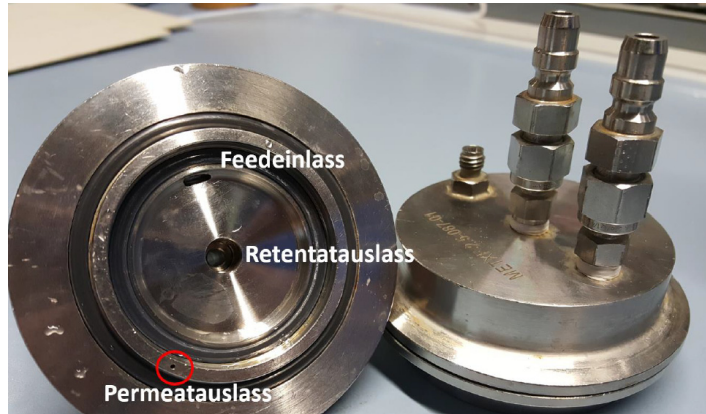

Figure S4: Circular METcell

## Appendix S5: Model assumptions and limitations from the SDEM by Yaroshchuk and Bruening [39]

- 1) Salts are assumed to fully dissociate in water without forming ion complexes
- 2) The electroneutrality condition is assumed to hold inside the membrane as well as within the bulk solution.
- 3) Activity coefficients were assumed to be 1.
- 4) Steady-State operation.
- 5) Neglection of convective coupling between the trans-membrane volume and solute flow.
- 5) Ionic permeances are considered composition-independent constants.
- 6) Virtual reference solution: is defined as a bulk electrolyte solution that could be in thermodynamic equilibrium with a given point inside the membrane.

7) The solute transport across the membrane is assumed to be one-dimensional, normal to the area of the active layer.

8) The electric potential is the only way how the transport between charged species is coupled.
